# Supplementary material for: Formation of hybrid ABX3perovskite compounds for solar cell application: first-principles calculations of effective ionic radii and determination of tolerance factors
Source: Royal Society of Chemistry journal article supplement (doi:10.1039/c6dt04796c), 2017-01-01
Supplement: c6dt04796c1.pdf [file c6dt04796c1.pdf]

## Computational details for calculating effective ionic radii

In order to obtain an effective ionic radius of a molecular cation, we first carried out geometry optimizations for finding the global energetic minimum on the potential energy surface (PES) in the gas phase. To sustain the best suited quantum mechanical level of theory for all following calculations, we performed geometry optimizations for the MA<sup>+</sup> cation substitutionary with restricted *Hartree-Fock* (RHF), second order *Møller-Plesset* perturbation theory (MP2), DFT, *coupled cluster theory* with single and double excitations (CCSD) and *coupled cluster theory* with single and double excitations with an additional estimate to triple excitations via perturbation theory (CCSD[T]). The basis set was chosen to be *split-valence triple zeta* with polarization functions, 6-311G\*\*.

The bond lengths of the MA<sup>+</sup> cation vary to negligible amounts between all the investigated methods (< 1.6 % difference in total). The differences are less than 0.7 % for the C-N bond, < 1.1 % for C-H bonds

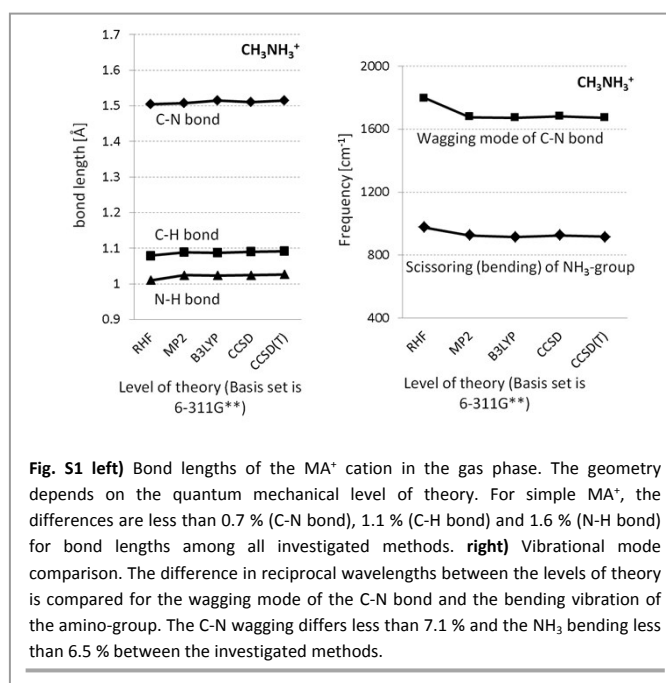

and < 1.6 % for N-H bonds. The B3LYP functional reveals geometric values, which are closest to the gold-standard CCSD(T) results, with differences of less than 0.1 % for the C-N bond, 0.4 % for C-H bonds and 0.3 % for N-H bonds, respectively (Fig. 2, left). Vibrational frequencies reveal differences in reciprocal wavelengths of less than 7.1 % for the wagging of the C-N bond and less than 6.5 % for the bending modes of the NH<sub>3</sub> group. Again, the B3LYP functional shows values closest to the results from CCSD(T) method, with differences of less than 0.07 % for C-N wagging and < 0.34 % for NH<sub>3</sub> bending (Fig. 2, right). Accordingly, it is not necessary to use intense cpu-time requiring methods like CCSD or CCSD(T), since DFT with the B3LYP hybrid functional can be used instead.

In order to investigate the influence of the basis set on the final geometry in a more precise way, we performed DFT calculations on the MA<sup>+</sup> cation with several basis sets from mid-sized 6-311G\*\* to large QZVP. As indicated in Fig. 3, the difference in total energy between the basis set 6-311G\*\* and QZVP is negligible small (< 0.02 %), so it is reasonable and computationally more effective to use 6-311G\*\*

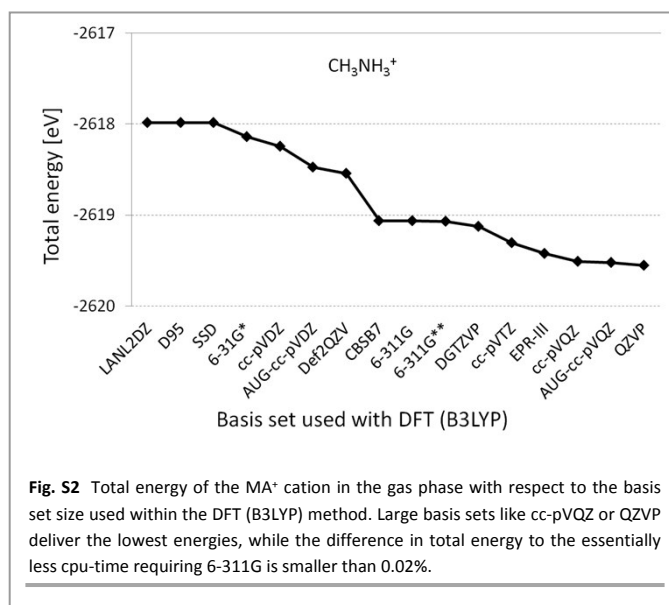

basis set for further calculations ( $\sim 340$  times less cpu run-time requiring compared to QZVP). To account for closed shell systems, the spin-multiplicity  $S$  ( $S = 2s + 1$ ) was fixed at 1. Furthermore, to check whether the optimized geometry is located on a minimum or on a transition state on the PES, we conducted frequency calculations based on the same level of theory and basis set (B3LYP with 6-311G\*\* basis set). In the case where imaginary frequencies were found, bond lengths and angles of the hydrogen atoms involved in the corresponding thermal movement were changed until the optimization yielded only positive frequencies. In order to check whether the energetic minimum was a local or a global one, we performed conformational test calculations. The starting geometry of the molecule was changed by modifying the dihedral angles and the bond lengths of all involved atom-groups. In cases where three substantially different geometries resulted in the same optimized total energy, it was assumed that the global minimum was found. All calculations were carried out with the latest version of Gaussian electronic structure modelling software (Gaussian 09)<sup>45</sup>. The charge density treatment was conducted with the freely available molecule editor Avogadro<sup>46,47</sup>.

We implied rotational freedom of the molecular cation around the center of mass in the optimized geometry. The total charge density was calculated first for  $\text{NH}_4^+$  and the isocharge density was selected in a manner, that the radius of the sphere which contained the whole isocharge density in every possible orientation of the molecular cation, fits the literature reference value for its ionic radius<sup>44</sup>. Since molecular cations in hybrid  $\text{ABX}_3$  compounds are located in a cuboctahedral void inside the  $\text{BX}_3^-$ -framework, we chose the reference ionic radius in a 12-fold coordination (in  $[\text{NH}_4]_2\text{BX}_6$ ) with an average of 1.695 Å. The resulting isocharge was found to be 0.013 electrons per cubic bohr [ $\text{e}/\text{bohr}^3$ ]. The radii of the remaining 17 cations (Fig. 2) were calculated by applying the afore-mentioned isocharge density to the total electron density and by building a sphere which contained 100 % of this isocharge density in every possible orientation (for effective radii see Table S1, SI).

Table S1 Revised tolerance factors of 486 ABX<sub>3</sub> combinations for prediction of 3D perovskite formation

| <u>Cl<sup>-</sup></u> |                  |                 |                 |                 |                 |                  |                 |                   |                 |                 |                      |                 |                    |                    |                 |                     |                   |                  |
|-----------------------|------------------|-----------------|-----------------|-----------------|-----------------|------------------|-----------------|-------------------|-----------------|-----------------|----------------------|-----------------|--------------------|--------------------|-----------------|---------------------|-------------------|------------------|
| molecular cation      | NH <sup>4+</sup> | HY <sup>+</sup> | HA <sup>+</sup> | MA <sup>+</sup> | FA <sup>+</sup> | GUA <sup>+</sup> | AZ <sup>+</sup> | DiMA <sup>+</sup> | EA <sup>+</sup> | AA <sup>+</sup> | TetraMA <sup>+</sup> | IM <sup>+</sup> | TriMA <sup>+</sup> | isoPA <sup>+</sup> | PY <sup>+</sup> | isoBuA <sup>+</sup> | DiEA <sup>+</sup> | PhA <sup>+</sup> |
| ionic radius [Å]      | 1.70             | 2.20            | 2.26            | 2.38            | 2.77            | 2.80             | 2.84            | 2.96              | 2.99            | 3.00            | 3.01                 | 3.03            | 3.04               | 3.07               | 3.22            | 3.60                | 3.85              | 3.88             |
| Ge <sup>2+</sup>      | 0.972            | 1.110           | 1.126           | 1.159           | 1.266           | 1.274            | 1.285           | 1.318             | 1.327           | 1.329           | 1.332                | 1.337           | 1.340              | 1.348              | 1.390           | 1.494               | 1.562             | 1.570            |
| Sn <sup>2+</sup>      | 0.836            | 0.955           | 0.969           | 0.997           | 1.089           | 1.096            | 1.105           | 1.134             | 1.141           | 1.143           | 1.146                | 1.150           | 1.153              | 1.160              | 1.195           | 1.285               | 1.344             | 1.351            |
| Pb <sup>2+</sup>      | 0.883            | 1.008           | 1.023           | 1.053           | 1.150           | 1.158            | 1.168           | 1.198             | 1.205           | 1.208           | 1.210                | 1.215           | 1.218              | 1.225              | 1.262           | 1.357               | 1.419             | 1.427            |
| Ca <sup>2+</sup>      | 0.905            | 1.034           | 1.049           | 1.080           | 1.179           | 1.187            | 1.197           | 1.228             | 1.236           | 1.238           | 1.241                | 1.246           | 1.248              | 1.256              | 1.294           | 1.391               | 1.455             | 1.463            |
| Sr <sup>2+</sup>      | 0.833            | 0.951           | 0.966           | 0.994           | 1.085           | 1.092            | 1.102           | 1.130             | 1.137           | 1.139           | 1.142                | 1.146           | 1.149              | 1.156              | 1.191           | 1.280               | 1.339             | 1.346            |
| Tm <sup>2+</sup>      | 0.902            | 1.030           | 1.045           | 1.076           | 1.175           | 1.183            | 1.193           | 1.223             | 1.231           | 1.234           | 1.236                | 1.241           | 1.244              | 1.251              | 1.290           | 1.386               | 1.450             | 1.457            |
| Sm <sup>2+</sup>      | 0.873            | 0.998           | 1.013           | 1.042           | 1.138           | 1.146            | 1.156           | 1.185             | 1.192           | 1.195           | 1.197                | 1.202           | 1.205              | 1.212              | 1.249           | 1.343               | 1.404             | 1.412            |
| Yb <sup>2+</sup>      | 0.925            | 1.057           | 1.072           | 1.104           | 1.205           | 1.213            | 1.224           | 1.255             | 1.263           | 1.265           | 1.268                | 1.273           | 1.276              | 1.284              | 1.323           | 1.422               | 1.487             | 1.495            |
| Dy <sup>2+</sup>      | 0.858            | 0.981           | 0.995           | 1.024           | 1.119           | 1.126            | 1.136           | 1.165             | 1.172           | 1.174           | 1.177                | 1.182           | 1.184              | 1.191              | 1.228           | 1.320               | 1.380             | 1.388            |
| <u>Br<sup>-</sup></u> |                  |                 |                 |                 |                 |                  |                 |                   |                 |                 |                      |                 |                    |                    |                 |                     |                   |                  |
| Ge <sup>2+</sup>      | 0.961            | 1.094           | 1.109           | 1.141           | 1.243           | 1.251            | 1.262           | 1.293             | 1.301           | 1.304           | 1.306                | 1.312           | 1.314              | 1.322              | 1.362           | 1.462               | 1.527             | 1.535            |
| Sn <sup>2+</sup>      | 0.831            | 0.946           | 0.959           | 0.987           | 1.075           | 1.082            | 1.091           | 1.119             | 1.125           | 1.128           | 1.130                | 1.135           | 1.137              | 1.144              | 1.178           | 1.264               | 1.321             | 1.328            |
| Pb <sup>2+</sup>      | 0.879            | 1.001           | 1.015           | 1.044           | 1.138           | 1.145            | 1.154           | 1.183             | 1.191           | 1.193           | 1.195                | 1.200           | 1.203              | 1.210              | 1.246           | 1.337               | 1.397             | 1.405            |
| Ca <sup>2+</sup>      | 0.901            | 1.025           | 1.040           | 1.069           | 1.165           | 1.173            | 1.183           | 1.212             | 1.220           | 1.222           | 1.225                | 1.229           | 1.232              | 1.239              | 1.276           | 1.370               | 1.431             | 1.439            |
| Sr <sup>2+</sup>      | 0.828            | 0.943           | 0.956           | 0.984           | 1.072           | 1.079            | 1.088           | 1.115             | 1.122           | 1.124           | 1.126                | 1.131           | 1.133              | 1.140              | 1.174           | 1.260               | 1.317             | 1.324            |
| Tm <sup>2+</sup>      | 0.894            | 1.018           | 1.033           | 1.062           | 1.157           | 1.165            | 1.174           | 1.204             | 1.211           | 1.214           | 1.216                | 1.221           | 1.223              | 1.231              | 1.267           | 1.360               | 1.422             | 1.429            |
| Sm <sup>2+</sup>      | 0.916            | 1.043           | 1.058           | 1.088           | 1.186           | 1.194            | 1.204           | 1.234             | 1.241           | 1.244           | 1.246                | 1.251           | 1.254              | 1.261              | 1.299           | 1.394               | 1.457             | 1.464            |
| Yb <sup>2+</sup>      | 0.910            | 1.036           | 1.051           | 1.081           | 1.178           | 1.185            | 1.195           | 1.225             | 1.232           | 1.235           | 1.237                | 1.242           | 1.245              | 1.252              | 1.290           | 1.384               | 1.447             | 1.454            |
| Dy <sup>2+</sup>      | 0.870            | 0.990           | 1.005           | 1.033           | 1.126           | 1.133            | 1.143           | 1.171             | 1.179           | 1.181           | 1.183                | 1.188           | 1.190              | 1.198              | 1.233           | 1.324               | 1.383             | 1.390            |
| <u>I<sup>-</sup></u>  |                  |                 |                 |                 |                 |                  |                 |                   |                 |                 |                      |                 |                    |                    |                 |                     |                   |                  |
| Ge <sup>2+</sup>      | 0.927            | 1.048           | 1.062           | 1.090           | 1.183           | 1.190            | 1.200           | 1.229             | 1.236           | 1.238           | 1.240                | 1.245           | 1.248              | 1.255              | 1.290           | 1.381               | 1.440             | 1.448            |
| Sn <sup>2+</sup>      | 0.869            | 0.981           | 0.995           | 1.022           | 1.109           | 1.115            | 1.124           | 1.151             | 1.158           | 1.160           | 1.162                | 1.167           | 1.169              | 1.176              | 1.209           | 1.294               | 1.350             | 1.356            |
| Pb <sup>2+</sup>      | 0.853            | 0.963           | 0.976           | 1.003           | 1.088           | 1.095            | 1.103           | 1.130             | 1.136           | 1.138           | 1.141                | 1.145           | 1.147              | 1.154              | 1.187           | 1.270               | 1.324             | 1.331            |
| Ca <sup>2+</sup>      | 0.883            | 0.997           | 1.011           | 1.038           | 1.126           | 1.133            | 1.142           | 1.169             | 1.176           | 1.179           | 1.181                | 1.185           | 1.188              | 1.194              | 1.228           | 1.314               | 1.371             | 1.378            |
| Sr <sup>2+</sup>      | 0.815            | 0.920           | 0.933           | 0.958           | 1.040           | 1.046            | 1.054           | 1.079             | 1.086           | 1.088           | 1.090                | 1.094           | 1.096              | 1.103              | 1.134           | 1.213               | 1.266             | 1.272            |
| Tm <sup>2+</sup>      | 0.874            | 0.988           | 1.001           | 1.028           | 1.116           | 1.122            | 1.131           | 1.158             | 1.165           | 1.167           | 1.170                | 1.174           | 1.176              | 1.183              | 1.217           | 1.302               | 1.358             | 1.365            |
| Sm <sup>2+</sup>      | 0.832            | 0.940           | 0.953           | 0.978           | 1.062           | 1.068            | 1.077           | 1.102             | 1.109           | 1.111           | 1.113                | 1.117           | 1.119              | 1.126              | 1.158           | 1.239               | 1.292             | 1.299            |
| Yb <sup>2+</sup>      | 0.880            | 0.994           | 1.008           | 1.035           | 1.123           | 1.130            | 1.139           | 1.166             | 1.172           | 1.175           | 1.177                | 1.182           | 1.184              | 1.191              | 1.224           | 1.310               | 1.367             | 1.374            |
| Dy <sup>2+</sup>      | 0.869            | 0.981           | 0.995           | 1.022           | 1.109           | 1.115            | 1.124           | 1.151             | 1.158           | 1.160           | 1.162                | 1.167           | 1.169              | 1.176              | 1.209           | 1.294               | 1.350             | 1.356            |

**Table S2 Revised octahedral factors of 27 BX<sub>3</sub><sup>-</sup> permutation.**

| <u>Cl<sup>-</sup></u>  | octahedral factor $\mu$ |
|------------------------|-------------------------|
| <b>Ge<sup>2+</sup></b> | 0.395                   |
| <b>Sn<sup>2+</sup></b> | 0.622                   |
| <b>Pb<sup>2+</sup></b> | 0.535                   |
| <b>Ca<sup>2+</sup></b> | 0.497                   |
| <b>Sr<sup>2+</sup></b> | 0.627                   |
| <b>Tm<sup>2+</sup></b> | 0.503                   |
| <b>Sm<sup>2+</sup></b> | 0.551                   |
| <b>Yb<sup>2+</sup></b> | 0.465                   |
| <b>Dy<sup>2+</sup></b> | 0.578                   |
|                        |                         |
| <u>Br<sup>-</sup></u>  |                         |
| <b>Ge<sup>2+</sup></b> | 0.372                   |
| <b>Sn<sup>2+</sup></b> | 0.587                   |
| <b>Pb<sup>2+</sup></b> | 0.500                   |
| <b>Ca<sup>2+</sup></b> | 0.464                   |
| <b>Sr<sup>2+</sup></b> | 0.592                   |
| <b>Tm<sup>2+</sup></b> | 0.474                   |
| <b>Sm<sup>2+</sup></b> | 0.439                   |
| <b>Yb<sup>2+</sup></b> | 0.449                   |
| <b>Dy<sup>2+</sup></b> | 0.515                   |
|                        |                         |
| <u>I<sup>-</sup></u>   |                         |
| <b>Ge<sup>2+</sup></b> | 0.350                   |
| <b>Sn<sup>2+</sup></b> | 0.441                   |
| <b>Pb<sup>2+</sup></b> | 0.468                   |
| <b>Ca<sup>2+</sup></b> | 0.418                   |
| <b>Sr<sup>2+</sup></b> | 0.536                   |
| <b>Tm<sup>2+</sup></b> | 0.432                   |
| <b>Sm<sup>2+</sup></b> | 0.505                   |
| <b>Yb<sup>2+</sup></b> | 0.423                   |
| <b>Dy<sup>2+</sup></b> | 0.441                   |

**Table S3 Revised B<sup>2+</sup> metal cation radii from Ref. 50 (Shannon radii used when colored in light blue!)**

Shannon radius → [X.XX](#)

| <b>r(M<sup>2+</sup>) revised</b> | <b>Cl<sup>-</sup></b> | <b>Br<sup>-</sup></b> | <b>I<sup>-</sup></b> |
|----------------------------------|-----------------------|-----------------------|----------------------|
| <b>Ge<sup>2+</sup></b>           | 0.73                  | 0.73                  | 0.77                 |
| <b>Sn<sup>2+</sup></b>           | 1.15                  | 1.15                  | 0.97                 |
| <b>Pb<sup>2+</sup></b>           | 0.99                  | 0.98                  | 1.03                 |
| <b>Ca<sup>2+</sup></b>           | 0.92                  | 0.91                  | 0.92                 |
| <b>Sr<sup>2+</sup></b>           | 1.16                  | 1.16                  | 1.18                 |
| <b>Tm<sup>2+</sup></b>           | 0.93                  | 0.93                  | 0.95                 |
| <b>Sm<sup>2+</sup></b>           | 1.02                  | 0.86                  | 1.11                 |
| <b>Yb<sup>2+</sup></b>           | 0.86                  | 0.88                  | 0.93                 |
| <b>Dy<sup>2+</sup></b>           | 1.07                  | 1.01                  | 0.97                 |

**Table S4 Experimental radii of the three investigated halide anions**

|                       |      |
|-----------------------|------|
| $r(X^-)$ experimental |      |
| $r(Cl^-)$             | 1.85 |
| $r(Br^-)$             | 1.96 |
| $r(I^-)$              | 2.20 |

**Table S5 Proposed 106 ABX<sub>3</sub> combinations showing appropriate tolerance factors ( $0.9 < TF < 1.12$ ) and octahedral factors ( $\mu > 0.414$ ) to allow for 3D perovskite formation. AZSnI<sub>3</sub> and AZDyl<sub>3</sub> exceed the  $TF$ -range but are geometrically considered to allow the formation of three-dimensional perovskite bulk phases.**

| Compound                | $TF$  | Compound                          | $TF$  |
|-------------------------|-------|-----------------------------------|-------|
| HYSrCl <sub>3</sub>     | 0.951 | DiMASmI <sub>3</sub>              | 1.102 |
| HASrCl <sub>3</sub>     | 0.966 | EASmI <sub>3</sub>                | 1.109 |
| MASrCl <sub>3</sub>     | 0.994 | AASmI <sub>3</sub>                | 1.111 |
| FASrCl <sub>3</sub>     | 1.085 | TetraMASmI <sub>3</sub>           | 1.113 |
| GUASrCl <sub>3</sub>    | 1.092 | IMSmI <sub>3</sub>                | 1.117 |
| AZSrCl <sub>3</sub>     | 1.102 | TriMASmI <sub>3</sub>             | 1.119 |
| HYSnCl <sub>3</sub>     | 0.955 | NH <sub>4</sub> TmCl <sub>3</sub> | 0.902 |
| HASnCl <sub>3</sub>     | 0.969 | HYTmCl <sub>3</sub>               | 1.030 |
| FASnCl <sub>3</sub>     | 1.089 | HATmCl <sub>3</sub>               | 1.045 |
| AZSnCl <sub>3</sub>     | 1.105 | MATmCl <sub>3</sub>               | 1.076 |
| HYSrBr <sub>3</sub>     | 0.943 | HAPbBr <sub>3</sub>               | 1.015 |
| HASrBr <sub>3</sub>     | 0.956 | HYCaCl <sub>3</sub>               | 1.034 |
| MASrBr <sub>3</sub>     | 0.984 | HACaCl <sub>3</sub>               | 1.049 |
| FASrBr <sub>3</sub>     | 1.071 | MACaCl <sub>3</sub>               | 1.080 |
| GUASrBr <sub>3</sub>    | 1.079 | HYTmBr <sub>3</sub>               | 1.018 |
| AZSrBr <sub>3</sub>     | 1.088 | HATmBr <sub>3</sub>               | 1.033 |
| DiMASrBr <sub>3</sub>   | 1.115 | MATmBr <sub>3</sub>               | 1.062 |
| HYSnBr <sub>3</sub>     | 0.946 | AZPbI <sub>3</sub>                | 1.103 |
| HASnBr <sub>3</sub>     | 0.959 | NH <sub>4</sub> YbCl <sub>3</sub> | 0.925 |
| FASnBr <sub>3</sub>     | 1.075 | HYybCl <sub>3</sub>               | 1.057 |
| GUASnBr <sub>3</sub>    | 1.082 | HAYbCl <sub>3</sub>               | 1.072 |
| AZSnBr <sub>3</sub>     | 1.091 | MAYbCl <sub>3</sub>               | 1.104 |
| DiMASnBr <sub>3</sub>   | 1.119 | NH <sub>4</sub> CaBr <sub>3</sub> | 0.900 |
| HYDyCl <sub>3</sub>     | 0.981 | HYCaBr <sub>3</sub>               | 1.025 |
| HADyCl <sub>3</sub>     | 0.995 | HACaBr <sub>3</sub>               | 1.040 |
| MADyCl <sub>3</sub>     | 1.024 | MACaBr <sub>3</sub>               | 1.069 |
| FADyCl <sub>3</sub>     | 1.119 | NH <sub>4</sub> YbBr <sub>3</sub> | 0.910 |
| HYSmCl <sub>3</sub>     | 0.998 | HYybBr <sub>3</sub>               | 1.036 |
| HASmCl <sub>3</sub>     | 1.013 | HAYbBr <sub>3</sub>               | 1.051 |
| MASmCl <sub>3</sub>     | 1.042 | MAYbBr <sub>3</sub>               | 1.081 |
| HYSrI <sub>3</sub>      | 0.920 | HYDyl <sub>3</sub>                | 0.981 |
| HASrI <sub>3</sub>      | 0.933 | HADyl <sub>3</sub>                | 0.995 |
| FASrI <sub>3</sub>      | 1.040 | MADyl <sub>3</sub>                | 1.022 |
| GUASrI <sub>3</sub>     | 1.046 | FADyl <sub>3</sub>                | 1.109 |
| AZSrI <sub>3</sub>      | 1.054 | GUADyl <sub>3</sub>               | 1.115 |
| DiMASrI <sub>3</sub>    | 1.080 | NH <sub>4</sub> SmBr <sub>3</sub> | 0.916 |
| EASrI <sub>3</sub>      | 1.086 | HYSmBr <sub>3</sub>               | 1.043 |
| AASrI <sub>3</sub>      | 1.088 | HASmBr <sub>3</sub>               | 1.058 |
| TetraMASrI <sub>3</sub> | 1.090 | MASmBr <sub>3</sub>               | 1.088 |
| IMSrI <sub>3</sub>      | 1.094 | HYTmI <sub>3</sub>                | 0.988 |
| TriMASrI <sub>3</sub>   | 1.096 | HATmI <sub>3</sub>                | 1.001 |
| isoPASrI <sub>3</sub>   | 1.103 | MATmI <sub>3</sub>                | 1.028 |
| HYPbCl <sub>3</sub>     | 1.008 | FATmI <sub>3</sub>                | 1.116 |
| HAPbCl <sub>3</sub>     | 1.023 | HYybI <sub>3</sub>                | 0.994 |
| HYDyBr <sub>3</sub>     | 0.990 | HAYbI <sub>3</sub>                | 1.008 |
| HADyBr <sub>3</sub>     | 1.005 | MAYbI <sub>3</sub>                | 1.035 |

|         |       |         |       |
|---------|-------|---------|-------|
| MADyBr3 | 1.033 | HYCaI3  | 0.997 |
| HYSmI3  | 0.940 | HACaI3  | 1.011 |
| HASmI3  | 0.953 | HYSnI3  | 0.981 |
| MASmI3  | 0.978 | HASnI3  | 0.995 |
| FASmI3  | 1.062 | GUASnI3 | 1.115 |
| GUASmI3 | 1.068 | AZSnI3  | 1.124 |
| AZSmI3  | 1.077 | AZDyI3  | 1.124 |
